# Supplementary material for: Genetic Mapping by Sequencing More Precisely Detects Loci Responsible for Anaerobic Germination Tolerance in Rice
Source: MDPI journal article supplement (doi:10.3390/plants10040705), 2021-04-06
Supplement: s1 [file s1]

## Supplementary Materials

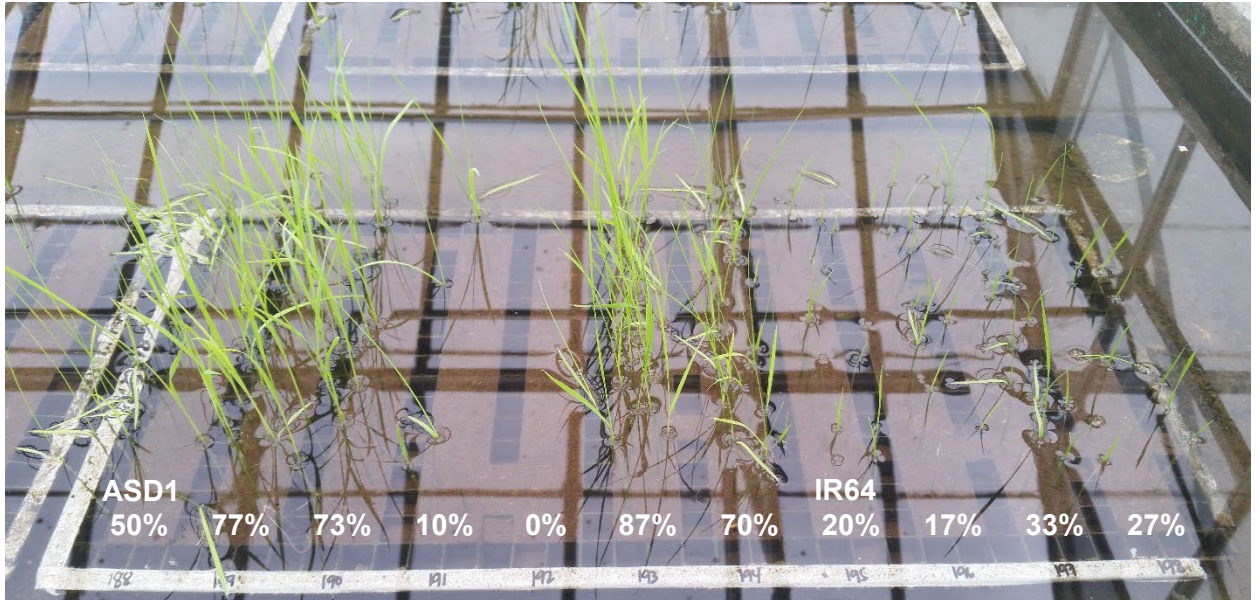

**Figure S1.** Representative tray showing different levels of survival rates of IR64 (20%), ASD1 (50%), and 9 of their F<sub>23</sub> progenies (0% to 87%) under anaerobic germination stress at 14 days after seeding.

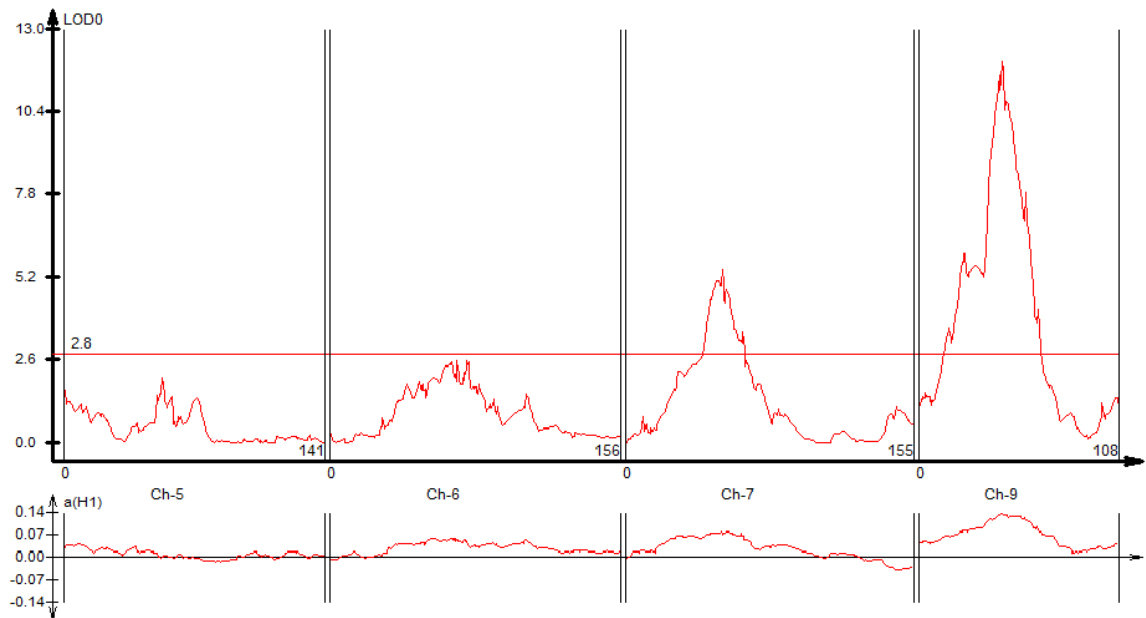

**Figure S2.** Plot of LOD from interval mapping QTL analysis of F<sub>23</sub> mapping population derived from IR64 and ASD1 on chromosomes 5, 6, 7 and 9 from WinQTL Cartographer

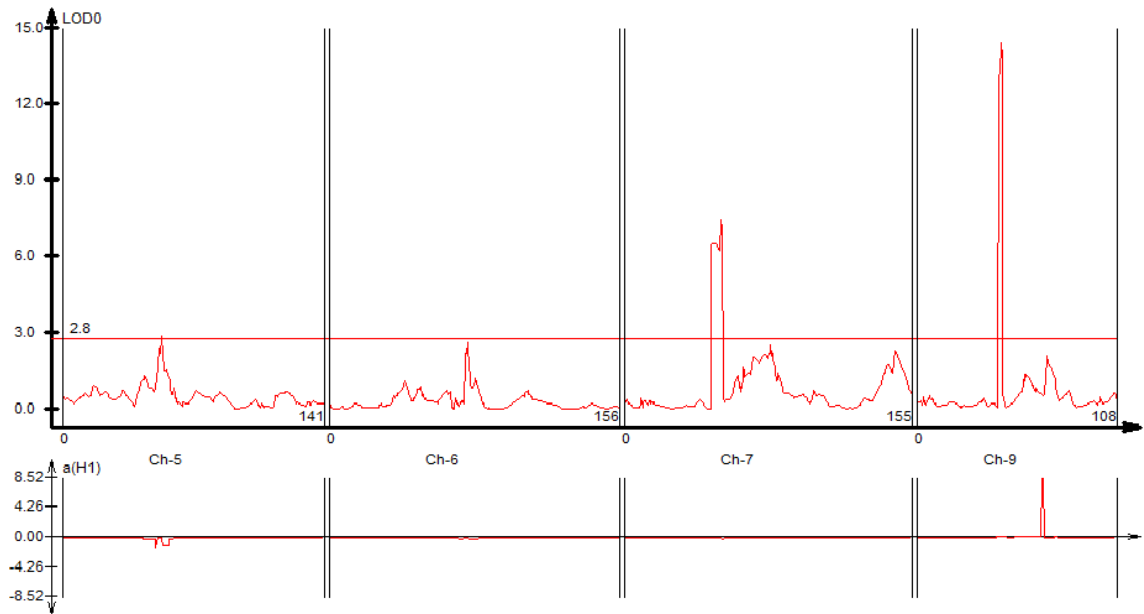

**Figure S3.** Plot of LOD from composite interval mapping QTL analysis of  $F_{2.3}$  mapping population derived from IR64 and ASD1 on chromosomes 5, 6, 7 and 9 from WinQTL Cartographer

**Table S1.** Distribution of genotypes at each data correction step

| Step                              | Length corrected | % A   | % B   | % H   | % N   |
|-----------------------------------|------------------|-------|-------|-------|-------|
| Input                             | -                | 27.41 | 24.80 | 27.42 | 20.38 |
| Imputation of missing data        | Indefinite       | 32.46 | 29.40 | 32.02 | 6.12  |
| Correct under-called heterozygous | $\leq 10$ bp     | 26.71 | 23.59 | 48.30 | 1.40  |
| Correct homozygous stretches      | $\leq 7$ bp      | 27.42 | 23.62 | 47.96 | 1.00  |
| Mask double recombination         | $\leq 4$ bp      | 27.35 | 23.51 | 47.96 | 1.19  |
| Mask chromosome ends              | $\leq 4$ bp      | 27.27 | 23.43 | 47.92 | 1.38  |
